# Supplementary material for: Characterization of WRKY Gene Family in Whole-Genome and Exploration of Flowering Improvement Genes in Chrysanthemum lavandulifolium
Source: Front Plant Sci. 2022 Apr 26;13:861193. doi: 10.3389/fpls.2022.861193 (PMC9087852; doi:10.3389/fpls.2022.861193)
Supplement: Supplementary file 1 [file Table_1.xlsx]

## Sheet: Sheet1
		Details of ClWRKY members
Protein Name	Group	Molecular Weight	pI	Introns	Amino acids
ClWRKY1	ΙΙe	31.2335	5.83	2	282
ClWRKY2	ΙΙΙ	37.5925	8.612	4	331
ClWRKY3	ΙΙΙ	28.8097	8.139	2	254
ClWRKY4	ΙΙΙ	26.0247	9.043	2	229
ClWRKY5	ΙΙΙ	29.3015	6.165	2	258
ClWRKY6	ΙΙΙ	28.8252	6.022	2	255
ClWRKY7	ΙΙΙ	32.946	6.866	2	289
ClWRKY8	ΙΙΙ	32.6214	7.009	2	292
ClWRKY9	ΙΙΙ	34.825	7.54	3	311
ClWRKY10	ΙΙΙ	32.7247	6.4	2	290
ClWRKY11	ΙΙΙ	28.8492	6.022	2	255
ClWRKY12	ΙΙΙ	29.864	6.123	2	264
ClWRKY13	ΙΙΙ	25.6763	9.254	2	227
ClWRKY14	ΙΙΙ	28.9858	8.467	2	254
ClWRKY15	ΙΙΙ	42.4807	7.012	2	376
ClWRKY16	Ι	46.2031	9.144	4	410
ClWRKY17	ΙΙd	34.41	9.768	2	304
ClWRKY18	Ι	53.3728	6.508	4	481
ClWRKY19	Ι	50.9881	9.148	4	455
ClWRKY20	Ι	11.8535	10.197	2	103
ClWRKY21	Ι	12.6694	10.632	2	110
ClWRKY22	ΙΙΙ	33.9082	6.311	3	295
ClWRKY23	ΙΙb	55.9615	5.879	4	505
ClWRKY24	ΙΙb	56.7393	5.707	4	512
ClWRKY25	Ι	53.4869	6.383	3	487
ClWRKY26	ΙΙb	48.455	7.388	5	438
ClWRKY27	ΙΙd	20.6273	10.546	1	191
ClWRKY28	ΙΙd	22.2845	9.692	4	198
ClWRKY29	ΙΙb	55.005	8.085	3	504
ClWRKY30	ΙΙe	35.1006	6.646	2	315
ClWRKY31	ΙΙΙ	35.63	5.914	2	314
ClWRKY32	ΙΙa	33.1184	7.751	4	289
ClWRKY33	ΙΙd	32.0354	10.099	3	292
ClWRKY34	ΙΙΙ	34.8007	5.381	2	310
ClWRKY35	ΙΙb	51.1793	6.72	5	463
ClWRKY36	Ι	76.2609	6.674	4	697
ClWRKY37	ΙΙe	22.1627	5.984	2	193
ClWRKY38	ΙΙe	24.6705	6.776	2	215
ClWRKY39	ΙΙe	25.4825	7.045	3	217
ClWRKY40	ΙΙΙ	33.7187	5.935	4	294
ClWRKY41	ΙΙd	37.8302	9.989	2	339
ClWRKY42	ΙΙc	32.9832	6.394	2	291
ClWRKY43	ΙΙc	32.6828	6.361	2	289
ClWRKY44	ΙΙe	37.086	6.57	2	329
ClWRKY45	ΙΙc	36.5503	6.215	2	325
ClWRKY46	ΙΙe	44.4247	5.9	2	401
ClWRKY47	ΙΙd	31.7849	5.03	3	283
ClWRKY48	ΙΙb	54.4505	6.815	4	499
ClWRKY49	ΙΙe	29.5976	5.169	3	260
ClWRKY50	ΙΙe	23.5116	4.808	2	208
ClWRKY51	ΙΙe	23.5819	5.597	2	207
ClWRKY52	ΙΙe	27.4752	5.141	2	243
ClWRKY53	ΙΙe	26.8629	6.056	2	236
ClWRKY54	ΙΙe	28.089	5.15	2	247
ClWRKY55	Ι	0.0180152	5.591	5	244
ClWRKY56	Ι	32.8915	5.186	5	289
ClWRKY57	Ι	57.3737	7.53	4	510
ClWRKY58	Ι	8.95559	10.164	1	74
ClWRKY59	ΙΙc	21.809	8.472	1	191
ClWRKY60	Ι	29.8996	8.534	4	264
ClWRKY61	Ι	29.177	9.706	2	258
ClWRKY62	ΙΙc	23.7315	9.986	2	213
ClWRKY63	Ι	42.4215	9.102	3	381
ClWRKY64	Ι	41.0841	9.152	3	367
ClWRKY65	ΙΙc	32.8162	6.76	2	297
ClWRKY66	ΙΙd	37.4844	9.913	2	338
ClWRKY67	Ι	58.1198	7.648	5	527
ClWRKY68	Ι	58.427	7.648	5	529
ClWRKY69	Ι	37.3041	6.851	3	339
ClWRKY70	ΙΙb	49.6732	5.104	6	455
ClWRKY71	ΙΙb	51.321	5.284	4	473
ClWRKY72	ΙΙΙ	28.4008	5.514	3	248
ClWRKY73	ΙΙΙ	29.5731	6.288	5	257
ClWRKY74	ΙΙe	26.2711	6.582	2	228
ClWRKY75	ΙΙe	22.026	4.729	2	197
ClWRKY76	ΙΙe	9.23967	10.122	1	80
ClWRKY77	ΙΙe	26.3443	6.519	2	228
ClWRKY78	ΙΙb	57.6899	7.803	2	529
ClWRKY79	ΙΙc	27.9006	6.798	2	247
ClWRKY80	ΙΙa	32.1529	8.409	5	291
ClWRKY81	ΙΙa	31.7863	8.423	3	290
ClWRKY82	ΙΙd	36.0349	10.067	2	328
ClWRKY83	ΙΙd	34.1367	9.279	2	313
ClWRKY84	Ι	58.5507	7.552	3	528
ClWRKY85	ΙΙb	52.2113	8.384	3	478
ClWRKY86	ΙΙc	20.726	9.042	1	182
ClWRKY87	ΙΙa	66.2267	5.772	9	578
ClWRKY88	ΙΙa	30.1357	5.143	4	264
ClWRKY89	ΙΙa	30.474	5.42	4	266
ClWRKY90	ΙΙa	49.5783	6.776	9	432
ClWRKY91	ΙΙe	39.8391	6.782	2	345
ClWRKY92	ΙΙc	25.4455	8.586	1	225
ClWRKY93	Ι	43.472	7.748	3	387
ClWRKY94	Ι	39.7778	8.072	3	354
ClWRKY95	Ι	16.6009	10.224	2	143
ClWRKY96	Ι	49.8307	6.12	4	448
ClWRKY97	ΙΙd	24.2554	10.299	3	220
ClWRKY98	ΙΙe	20.3874	5.701	2	178
ClWRKY99	ΙΙΙ	37.7398	5.664	2	335
ClWRKY100	Ι	55.1185	8.046	3	498
ClWRKY101	ΙΙc	32.3975	5.576	2	293
ClWRKY102	Ι	51.6148	6.238	3	446
ClWRKY103	ΙΙΙ	35.8482	6.483	2	311
ClWRKY104	ΙΙΙ	31.4303	6.768	4	278
ClWRKY105	ΙΙΙ	35.4134	5.53	2	310
ClWRKY106	ΙΙΙ	34.5357	6.266	4	300
ClWRKY107	ΙΙa	27.1222	6.117	3	238
ClWRKY108	ΙΙa	26.2804	7.273	4	229
ClWRKY109	ΙΙΙ	27.7045	8.16	2	247
ClWRKY110	ΙΙΙ	31.8685	5.239	2	278
ClWRKY111	ΙΙΙ	19.7593	6.788	3	176
ClWRKY112	ΙΙΙ	36.2664	5.483	2	319
ClWRKY113	ΙΙΙ	35.8048	5.934	2	321
ClWRKY114	ΙΙΙ	35.9599	6.26	2	320
ClWRKY115	ΙΙΙ	39.2471	6.192	3	345
ClWRKY116	ΙΙΙ	27.7074	8.295	2	244
ClWRKY117	ΙΙΙ	36.5097	5.999	2	320
ClWRKY118	ΙΙΙ	35.8041	6.483	2	311
ClWRKY119	ΙΙΙ	33.7187	5.935	3	294
ClWRKY120	Ι	41.4523	8.874	4	370
ClWRKY121	Ι	40.3246	8.132	3	361
ClWRKY122	ΙΙΙ	26.4071	9.556	2	231
ClWRKY123	ΙΙΙ	35.143	5.361	2	306
ClWRKY124	ΙΙΙ	35.2658	4.907	2	307
ClWRKY125	ΙΙΙ	26.3184	6.145	1	234
ClWRKY126	ΙΙΙ	37.5272	6.413	2	330
ClWRKY127	ΙΙΙ	37.2458	7.649	2	323
ClWRKY128	ΙΙΙ	36.3896	6.159	2	320
ClWRKY129	ΙΙΙ	34.6325	5.875	3	307
ClWRKY130	ΙΙΙ	30.1038	6.062	3	266
ClWRKY131	ΙΙΙ	16.5541	9.217	2	141
ClWRKY132	ΙΙΙ	35.2714	4.776	3	311
ClWRKY133	ΙΙΙ	35.0469	5.761	3	307
ClWRKY134	ΙΙΙ	61.4015	7.765	6	542
ClWRKY135	ΙΙΙ	30.8388	6.715	3	271
ClWRKY136	ΙΙΙ	37.6064	6.211	2	332
ClWRKY137	ΙΙΙ	36.7901	5.595	2	321
ClWRKY138	ΙΙΙ	26.381	9.249	2	231
